# Supplementary material for: Integrating evolutionarily novel horns within the deeply conserved insect head
Source: PubMed Central journal article supplement (PMC7171871; doi:10.1186/s12915-020-00773-9), 2020-04-20
Supplement: 12915_2020_773_MOESM5_ESM.pdf [file 12915_2020_773_MOESM5_ESM.pdf]

| Core Gene Category                       | Accession                         | <i>Drosophila</i> Best Hit                                     |
|------------------------------------------|-----------------------------------|----------------------------------------------------------------|
| F_LatP & M_LatP "overlapping core genes" | XM_023057035.1                    | twin of eyeless, isoform A                                     |
|                                          | XM_023063962.1                    | atonal                                                         |
|                                          | XM_023052220.1                    | scarlet                                                        |
|                                          | XM_023063565.1                    | chaoptin, isoform D                                            |
|                                          | XM_023063463.1                    | vermilion                                                      |
|                                          | XM_023059398.1                    | Rab32, isoform I                                               |
|                                          | XM_023054391.1                    | uncharacterized protein*                                       |
|                                          | XM_023049527.1                    | cinnabar                                                       |
|                                          | XM_023063740.1                    | 2mit, isoform B                                                |
|                                          | XM_023057901.1                    | mahogany                                                       |
|                                          | XM_023058634.1                    | Dopamine/Ecdysteroid receptor, isoform A                       |
|                                          | XM_023048335.1                    | uncharacterized protein, isoform A                             |
|                                          | XM_023062884.1                    | uncharacterized protein                                        |
|                                          | XM_023051901.1                    | white                                                          |
|                                          | XM_023059806.1                    | cardinal                                                       |
|                                          | XM_023057872.1                    | Big brother, isoform A                                         |
|                                          | F_LatP "female-unique core genes" | XM_023044496.1                                                 |
| XM_023058611.1                           |                                   | neither inactivation nor afterpotential C, isoform B           |
| XM_023057345.1                           |                                   | uncharacterized protein, isoform A                             |
| XM_023064314.1                           |                                   | cuticular protein 62Bc, isoform A                              |
| XM_023065426.1                           |                                   | uncharacterized protein                                        |
| XM_023054425.1                           |                                   | n/a*                                                           |
| XM_023057456.1                           |                                   | Ecdysone-inducible gene E1, isoform A                          |
| XM_023048629.1                           |                                   | kekkon-2                                                       |
| XM_023060996.1                           |                                   | uncharacterized protein                                        |
| XM_023056117.1                           |                                   | ring finger and CHY zinc finger domain containing 1, isoform A |
| XM_023063754.1                           |                                   | uncharacterized protein, isoform D                             |
| XM_023054474.1                           |                                   | rough, isoform B                                               |
| XM_023044971.1                           |                                   | uncharacterized protein, isoform B                             |
| XM_023054975.1                           |                                   | uncharacterized protein, isoform B                             |
| XM_023045205.1                           |                                   | spalt major, isoform B                                         |
| XM_023051322.1                           |                                   | uncharacterized protein                                        |
| XM_023048878.1                           |                                   | arrestin 2                                                     |
| XM_023057704.1                           |                                   | uncharacterized protein, isoform A                             |
| XM_023054502.1                           |                                   | uncharacterized protein, isoform B                             |
| XM_023046361.1                           |                                   | n/a                                                            |
| XM_023045242.1                           |                                   | neither inactivation nor afterpotential A                      |
| XM_023063673.1                           |                                   | Ance-3, isoform C                                              |
| XM_023050102.1                           |                                   | TWIK-related acid-sensitive K[+] channel 7                     |
| XM_023051765.1                           | golden goal                       |                                                                |
| M_LatP "male-unique core genes"          | XM_023052295.1                    | Toll-6, isoform A                                              |
|                                          | XM_023044511.1                    | Toll-6, isoform A                                              |
|                                          | XM_023049427.1                    | G protein beta-subunit 76C                                     |
|                                          | XM_023044514.1                    | uncharacterized protein, isoform A                             |
|                                          | XM_023047389.1                    | black match, isoform F                                         |
|                                          | XM_023044973.1                    | glass, isoform A                                               |
|                                          | XM_023063666.1                    | atonal                                                         |
|                                          | XM_023052296.1                    | Toll-6, isoform A                                              |

\*putative taxon-restricted gene
