# Supplementary material for: Integrating evolutionarily novel horns within the deeply conserved insect head
Source: PubMed Central journal article supplement (PMC7171871; doi:10.1186/s12915-020-00773-9), 2020-04-20
Supplement: 12915_2020_773_MOESM6_ESM.pdf [file 12915_2020_773_MOESM6_ESM.pdf]

| Accession      | Core Gene Category              | <i>Drosophila</i> Best hit                             |
|----------------|---------------------------------|--------------------------------------------------------|
| XM_023060389.1 | F_MP & M_MP "core genes"        | C15                                                    |
| XM_023056593.1 | F_MP & M_MP "core genes"        | uncharacterized protein                                |
| XM_023063195.1 | F_MP "female-unique core genes" | 5-hydroxytryptamine (serotonin) receptor 2A, isoform D |
| XM_023046186.1 | F_MP "female-unique core genes" | uncharacterized protein*                               |
| XM_023064396.1 | M_MP "male-unique core genes"   | muscle protein 20, isoform C                           |
| XM_023064401.1 | M_MP "male-unique core genes"   | muscle LIM protein at 84B, isoform B                   |
| XM_023055299.1 | M_MP "male-unique core genes"   | ejaculatory bulb protein III, isoform A                |
| XM_023060525.1 | M_MP "male-unique core genes"   | uncharacterized protein, isoform C                     |
| XM_023058740.1 | M_MP "male-unique core genes"   | myofilin, isoform E                                    |
| XM_023044825.1 | M_MP "male-unique core genes"   | tropomyosin 2, isoform B                               |
| XM_023046178.1 | M_MP "male-unique core genes"   | uncharacterized protein                                |
| XM_023053748.1 | M_MP "male-unique core genes"   | uncharacterized protein, isoform B                     |
| XM_023049599.1 | M_MP "male-unique core genes"   | troponin C at 47D, isoform A                           |

\*putative taxon-restricted gene
