# Supplementary material for: Integrating evolutionarily novel horns within the deeply conserved insect head
Source: PubMed Central journal article supplement (PMC7171871; doi:10.1186/s12915-020-00773-9), 2020-04-20
Supplement: 12915_2020_773_MOESM9_ESM.pdf [file 12915_2020_773_MOESM9_ESM.pdf]

| Selection Criteria               | Accession/Gene Identifier              | Region of Expression      | Drosophila Best Hit        | Species Injected      | Stage Injected        | Concentration of dsRNA | Injected Total | Lethality |       |        | Survived to Adults | Adult w/ phenotype | Survival           | Horn Phenotype     | Phenotype Description                              |                                                    |
|----------------------------------|----------------------------------------|---------------------------|----------------------------|-----------------------|-----------------------|------------------------|----------------|-----------|-------|--------|--------------------|--------------------|--------------------|--------------------|----------------------------------------------------|----------------------------------------------------|
|                                  |                                        |                           |                            |                       |                       |                        |                | Larvae    | Pupae | Adults |                    |                    |                    |                    |                                                    |                                                    |
| embryonic head patterning genes  | XM_023045958.1                         | Fig. S5 A                 | <i>sloppy-paired</i>       | <i>O. taurus</i>      | early L3              | 1 µg/µl                | 11             | /         | 1     | /      | 10                 | 0                  | 91%                | n.o.a.             | n.o.a.                                             |                                                    |
|                                  | XM_023058224.1                         | Fig. S5 B                 | <i>mirror</i>              | <i>O. taurus</i>      | early L3              | 1 µg/µl                | 10             | 1         | /     | /      | 9                  | 9                  | 90%                | n.o.a.             | wings, first thoracic segment irregular, eye       |                                                    |
|                                  | XM_023051010.1                         | Fig. S5 C                 | <i>lim 1</i>               | <i>O. taurus</i>      | early L3              | 1 µg/µl                | 10             | 1         | /     | /      | 9                  | 8                  | 90%                | n.o.a.             | leg, antennae, mouthparts                          |                                                    |
|                                  | XM_023064427.1                         | Fig. S5 D                 | <i>mex3</i>                | <i>O. taurus</i>      | early L3              | 1 µg/µl                | 11             | /         | /     | /      | 10                 | 6                  | 91%                | n.o.a.             | leg, mouthparts, wings                             |                                                    |
|                                  | XM_023047875.1                         | Fig. S5 E                 | <i>knirps</i>              | <i>O. taurus</i>      | early L3              | 1 µg/µl                | 12             | /         | /     | 1      | 11                 | 8                  | 92%                | n.o.a.             | wings                                              |                                                    |
|                                  | XM_023050477.1                         | Fig. S5 F                 | <i>crocodile</i>           | <i>O. taurus</i>      | early L3              | 1 µg/µl                | 22             | 7         | 5     | 10     | 10                 | 6                  | 45%                | n.o.a.             | mouthparts                                         |                                                    |
|                                  | XM_023050882.1                         | Fig. 4 I                  | <i>Sp8/Sp1</i>             | <i>O. taurus</i>      | early L3              | 1 µg/µl                | 18             | 7         | /     | /      | 11                 | 10                 | 61%                | n.o.a. Fig. 6      | mouthparts and legs (Fig. S5 and S6)               |                                                    |
|                                  | XM_023045049.1                         | Fig. 4 H                  | <i>cap'n'collar</i>        | <i>O. taurus</i>      | early L3              | 1 µg/µl                | 17             | 4         | /     | /      | 13                 | 12                 | 76%                | n.o.a. Fig. 6      | mouthparts (Fig. S5)                               |                                                    |
|                                  | XM_023059686.1                         | Fig. 4 G                  | <i>retinal homeobox</i>    | <i>O. taurus</i>      | early L3              | 2 µg/µl                | 12             | 6         | 4     | 2      | 0                  | /                  | 0%                 | Fig. 6             | mouthparts (Fig. S5)                               |                                                    |
|                                  |                                        |                           |                            |                       |                       | 1 µg/µl                | 22             | 4         | 1     | /      | 17                 | 14                 | 77%                |                    |                                                    |                                                    |
|                                  |                                        | <i>O. sagittarius Sp8</i> |                            | <i>Sp8/Sp1</i>        | <i>O. sagittarius</i> | early L3               | 1 µg/µl        | 12        | 5     | /      | /                  | 7                  | 7                  | 58%                | Fig. 6                                             | mouthparts and legs (Fig. S5 and S6)               |
|                                  | <i>O. sagittarius cap'n'collar</i>     | n/a                       | <i>cap'n'collar</i>        | <i>O. sagittarius</i> | early L3              | 1 µg/µl                | 24             | 6         | /     | /      | 18                 | 10                 | 75%                | Fig. 6             | mouthparts (Fig. S5)                               |                                                    |
|                                  | <i>O. sagittarius retinal homeobox</i> |                           | <i>retinal homeobox</i>    | <i>O. sagittarius</i> | mid L3                | 2 µg/µl                | 12             | 1         | /     | /      | 11                 | 7                  | 92%                | Fig. 6             | mouthparts (Fig. S5)                               |                                                    |
|                                  |                                        |                           |                            |                       | 1 µg/µl               | 8                      | 4              | /         | /     | 4      | 1                  | 50%                |                    |                    |                                                    |                                                    |
| posterior-unique head expression | XM_023064833.1*                        | Fig. S5 M                 | <i>n/a</i>                 | <i>O. taurus</i>      | early L3              | 1 µg/µl                | 12             | 1         | /     | /      | 11                 | 0                  | 92%                | n.o.a.             | n.o.a.                                             |                                                    |
|                                  | XM_023054237.1                         | Fig. S5 K                 | <i>aristalless</i>         | <i>O. taurus</i>      | early L3              | 1 µg/µl                | 22             | 2         | 1     | /      | 19                 | 5                  | 86%                | n.o.a.             | leg, antennae                                      |                                                    |
|                                  | XM_023064084.1                         | Fig. S5 H                 | <i>serine protease</i>     | <i>O. taurus</i>      | early L3              | 1 µg/µl                | 20             | 10        | 1     | /      | 13                 | 0                  | 65%                | n.o.a.             | n.o.a.                                             |                                                    |
|                                  | XM_023054389.1                         | Fig. S5 H                 | <i>uncharacterized</i>     | <i>O. taurus</i>      | early L3              | 1 µg/µl                | 35             | 17        | 2     | /      | 16                 | 0                  | 46%                | n.o.a.             | n.o.a.                                             |                                                    |
|                                  | XM_023055853.1*                        | Fig. S5 L                 | <i>n/a</i>                 | <i>O. taurus</i>      | early L3              | 1 µg/µl                | 12             | 1         | 1     | 2      | 10                 | 0                  | 83%                | n.o.a.             | n.o.a.                                             |                                                    |
|                                  | XM_023056824.1                         | Fig. S5 G                 | <i>cuticle protein 67B</i> | <i>O. taurus</i>      | early L3              | 1 µg/µl                | 24             | 5         | /     | /      | 19                 | 0                  | 79%                | n.o.a.             | n.o.a.                                             |                                                    |
|                                  | XM_023049046.1                         | Fig. S5 G                 | <i>uncharacterized</i>     | <i>O. taurus</i>      | early L3              | 1 µg/µl                | 21             | 6         | /     | /      | 15                 | 0                  | 71%                | n.o.a.             | n.o.a.                                             |                                                    |
|                                  | XM_023051322.1                         | Fig. S5 J                 | <i>uncharacterized</i>     | <i>O. taurus</i>      | early L3              | 1 µg/µl                | 24             | 5         | /     | /      | 19                 | 0                  | 79%                | n.o.a.             | n.o.a.                                             |                                                    |
|                                  | XM_023059293.1                         | Fig. S5 I                 | <i>Fish-lips</i>           | <i>O. taurus</i>      | early L3              | 1 µg/µl                | 24             | 5         | 2     | /      | 17                 | 0                  | 71%                | n.o.a.             | n.o.a.                                             |                                                    |
|                                  | XM_023052689.1                         | Fig. S5 I                 | <i>uncharacterized</i>     | <i>O. taurus</i>      | early L3              | 1 µg/µl                | 20             | 3         | 5     | /      | 12                 | 0                  | 60%                | n.o.a.             | n.o.a.                                             |                                                    |
|                                  | XM_023052984.1                         | Fig. S5 I                 | <i>mab-21</i>              | <i>O. taurus</i>      | early L3              | 1 µg/µl                | 17             | 7         | /     | /      | 10                 | 0                  | 59%                | n.o.a.             | n.o.a.                                             |                                                    |
|                                  | XM_023046672.1                         | Fig. S5 I                 | <i>Myd88</i>               | <i>O. taurus</i>      | early L3              | 1 µg/µl                | 24             | 10        | 1     | /      | 13                 | 0                  | 54%                | n.o.a.             | n.o.a.                                             |                                                    |
|                                  | XM_023045701.1                         | Fig. S5 I                 | <i>unc-13</i>              | <i>O. taurus</i>      | early L3              | 1 µg/µl                | 17             | 9         | /     | /      | 8                  | 0                  | 47%                | n.o.a.             | n.o.a.                                             |                                                    |
| Wnt signaling                    |                                        |                           |                            |                       | early L3              | 1 µg/µl                | 12             | 0         | 12    | /      | 0                  | /                  | 0%                 | n.o.a.             |                                                    |                                                    |
|                                  | XM_023049346.1                         | n/a                       | <i>axin</i>                | <i>O. taurus</i>      | mid L3                | 1 µg/µl                | 12             | 1         | 10    | /      | 1                  | /                  | 8%                 | pupae - see Fig. 5 | wings, legs, antennae, mouthparts, and T1 (Fig. 5) |                                                    |
|                                  |                                        |                           |                            |                       | late L3               | 1 µg/µl                | 28             | 9         | 12    | /      | 7                  | /                  | 25%                | pupae - see Fig. 5 |                                                    |                                                    |
|                                  |                                        |                           |                            |                       | mid L3                | 100 ng/µl              | 24             | 16        | 7     | /      | 1                  | /                  | 4%                 | n.o.a.             |                                                    |                                                    |
|                                  |                                        |                           |                            |                       |                       | early L3               | 1 µg/µl        | 12        | 1     | 11     | /                  | 0                  | /                  | 0%                 | n.o.a.                                             | wings, legs, antennae, mouthparts, and T1 (Fig. 5) |
|                                  | XM_023050771.1                         | n/a                       | <i>disheveled</i>          | <i>O. taurus</i>      | late L3               | 1 µg/µl                | 9              | 1         | 5     | /      | 3                  | /                  | 33%                | pupae - see Fig. 5 |                                                    |                                                    |
|                                  |                                        |                           |                            | mid L3                | 100 ng/µl             | 24                     | 14             | 8         | /     | 2      | /                  | 8%                 | pupae - see Fig. 5 |                    |                                                    |                                                    |

n.o.a = no observable abnormality

\*putative taxon-restricted gene - no orthologs
