# Supplementary material for: Integrating evolutionarily novel horns within the deeply conserved insect head
Source: PubMed Central journal article supplement (PMC7171871; doi:10.1186/s12915-020-00773-9), 2020-04-20
Supplement: 12915_2020_773_MOESM13_ESM.pdf [file 12915_2020_773_MOESM13_ESM.pdf]

| Gene / Accession Number                     | Species               | Clone Length | dsRNA Length | cloning              |                      | dsRNA synthesis |                    |
|---------------------------------------------|-----------------------|--------------|--------------|----------------------|----------------------|-----------------|--------------------|
|                                             |                       |              |              | primer 1             | primer 2             | Primer 1*       | Primer 2*          |
| XM_023059686.1 - <i>retinal homeobox</i>    | <i>O. taurus</i>      | 303bp        | 303bp        | AGTATGCTGGGTTTCGGCCT | TGCAGTTTCCCCACTTCCG  |                 | ***                |
| XM_023045049.1 - <i>cap'n'collar</i>        | <i>O. taurus</i>      | 543bp        | 543bp        | TCCTCCGCCAGCAAAGTTGA | TTGCCATCGCTGTTCCATGC |                 | ***                |
| XM_023050882.1 - <i>Sp8</i>                 | <i>O. taurus</i>      | 499bp        | 499bp        | TTCTTGGTGCACGACAAGT  | GGTGATGGGACCTGAGGTGG |                 | ***                |
| n/a - <i>retinal homeobox</i>               | <i>O. sagittarius</i> | 303bp        | 303bp        |                      |                      | synthesized**   | T7-AGTATGCTGGGTTTC |
| n/a - <i>cap'n'collar</i>                   | <i>O. sagittarius</i> | 543bp        | 543bp        |                      |                      | synthesized**   | T7-TCTTCCGCCAGCAAC |
| n/a - <i>Sp8</i>                            | <i>O. sagittarius</i> | 499bp        | 499bp        |                      |                      | synthesized**   | T7-TTCCCTGGTGCACGA |
| XM_023049346.1 - <i>axin</i>                | <i>O. taurus</i>      | 250bp        | 250bp        |                      |                      | synthesized**   | T7-TGAAATCGTCGTGTC |
| XM_023050771.1 - <i>disheveled</i>          | <i>O. taurus</i>      | 250bp        | 250bp        |                      |                      | synthesized**   | T7-GAAAGTGGATCAGGT |
| XM_023045958.1 - <i>sloppy-paired</i>       | <i>O. taurus</i>      | 250bp        | 250bp        |                      |                      | synthesized**   | T7-GCAACGAGCCGACAG |
| XM_023058224.1 - <i>mirror</i>              | <i>O. taurus</i>      | 517bp        | 517bp        | AGCGGTCCAGATAGCCCTGA | GTCGACGACGGTGACATCT  |                 | ***                |
| XM_023051010.1 - <i>lim 1</i>               | <i>O. taurus</i>      | 529bp        | 529bp        | GAAAGGACGTGGCACGCAA  | CCTCCGAGTCGTCTTGACCC |                 | ***                |
| XM_023064427.1 - <i>mex3</i>                | <i>O. taurus</i>      | 250bp        | 250bp        |                      |                      | synthesized**   | T7-ATAAAAGCATTACGA |
| XM_023047875.1 - <i>knirps</i>              | <i>O. taurus</i>      | 250bp        | 250bp        |                      |                      | synthesized**   | T7-TCAAATGGTTTAAA  |
| XM_023050477.1 - <i>crocodile</i>           | <i>O. taurus</i>      | 559bp        | 559bp        | GGCTTGGCCTCACCAACAAC | AATTGAGGCGGCAACATCGC |                 | ***                |
| XM_023064833.1 - uncharacterized            | <i>O. taurus</i>      | 250bp        | 250bp        |                      |                      | synthesized**   | T7-AAGTGTTCCTCCTA  |
| XM_023054237.1 - <i>aristales</i>           | <i>O. taurus</i>      | 250bp        | 250bp        |                      |                      | synthesized**   | T7-CCAAATCCTTTCAAC |
| XM_023064084.1 - <i>serine protease</i>     | <i>O. taurus</i>      | 250bp        | 250bp        |                      |                      | synthesized**   | T7-TTACCATCAGATTGT |
| XM_023054389.1 - uncharacterized            | <i>O. taurus</i>      | 250bp        | 250bp        |                      |                      | synthesized**   | T7-AAAGCGTTTTTGTT  |
| XM_023055853.1 - uncharacterized            | <i>O. taurus</i>      | 250bp        | 250bp        |                      |                      | synthesized**   | T7-AAATCGTTCGTGTT  |
| XM_023056824.1 - <i>cuticle protein 67B</i> | <i>O. taurus</i>      | 250bp        | 250bp        |                      |                      | synthesized**   | T7-ATGAACACCTTCATC |
| XM_023049046.1 - uncharacterized            | <i>O. taurus</i>      | 250bp        | 250bp        |                      |                      | synthesized**   | T7-GATATTATTAATGCT |
| XM_023051322.1 - uncharacterized            | <i>O. taurus</i>      | 250bp        | 250bp        |                      |                      | synthesized**   | T7-TCGGTGGTATGCAAG |
| XM_023059293.1 - <i>Fish-lips</i>           | <i>O. taurus</i>      | 250bp        | 250bp        |                      |                      | synthesized**   | T7-GAAAAATCCGAGTTT |
| XM_023052689.1 - uncharacterized            | <i>O. taurus</i>      | 250bp        | 250bp        |                      |                      | synthesized**   | T7-ATTTTATAATCCATA |
| XM_023052984.1 - <i>mab-21</i>              | <i>O. taurus</i>      | 250bp        | 250bp        |                      |                      | synthesized**   | T7-ATGTTGGTTCACCG  |
| XM_023046672.1 - <i>Myd88</i>               | <i>O. taurus</i>      | 250bp        | 250bp        |                      |                      | synthesized**   | T7-ATGAGCGATTCCACA |
| XM_023045701.1 - <i>unc-13</i>              | <i>O. taurus</i>      | 250bp        | 250bp        |                      |                      | synthesized**   | T7-ATGCGGTCGAGACT  |

\*T7 is T7 tail: TAATACGACTCACTATAGGG

\*\*Synthesized by IDT Gblock gene synthesis services

\*\*\*TOPO RNAi Primer - TAATACGACTCACTATAGGGCGAATTCGCCCTT
